# Supplementary material for: OHphenol⋯OHalcohol hydrogen-bonding as the preferred hydrogen-bonded interaction in the crystal structures of three isomers of methylolphenol: analysis of hydrogen-bonding interactions in phenol and alcohol containing molecules
Source: Royal Society of Chemistry journal article supplement (doi:10.1039/c1ce05442b), 2011-01-01
Supplement: c1ce05442b.pdf [file c1ce05442b.pdf]

Powder X-ray diffraction data for all compounds were collected on a Philips powder diffractometer using  $\text{CuK}_\alpha$ -radiation, graphite monochromator on diffracted beam and operating at 40 kV, 30 mA at 293 K.

Differential Scanning Calorimetry scans were done on a Mettler Toledo 422° on **2** and a Thermal Analysis DSC-Q10 for **1** and **3**.

## 1) 2-methylolphenol (1)

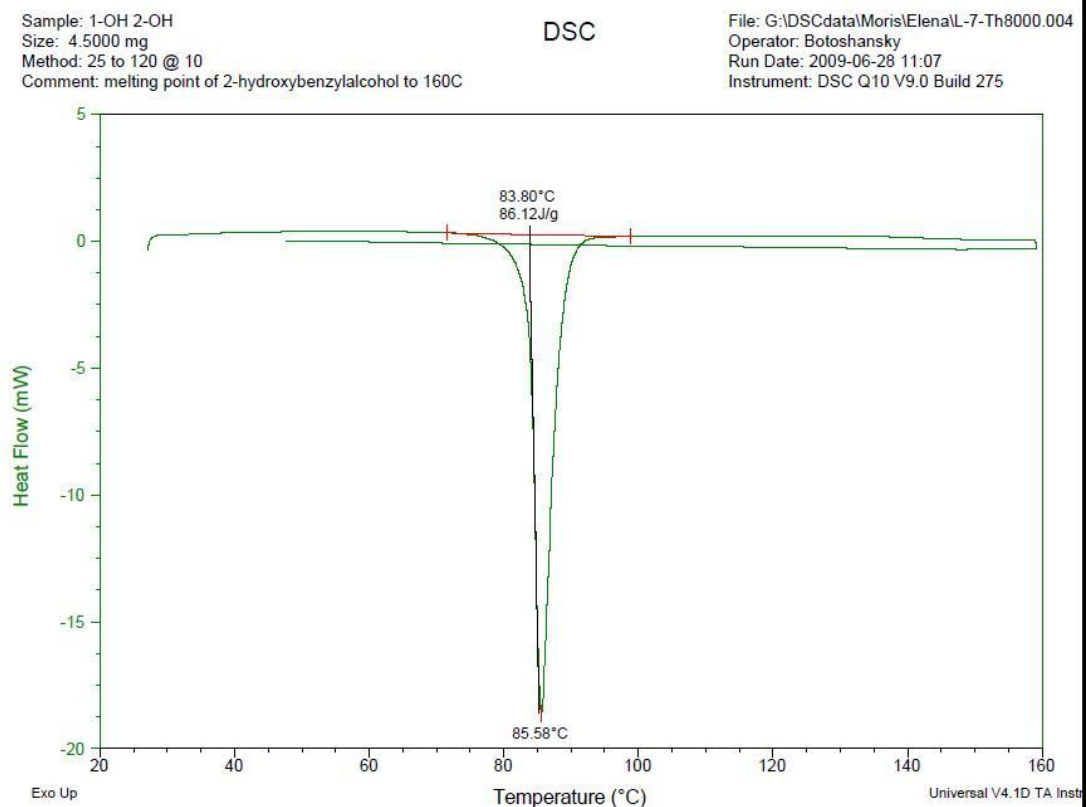

Figure S1: DSC trace for 2-methylolphenol.

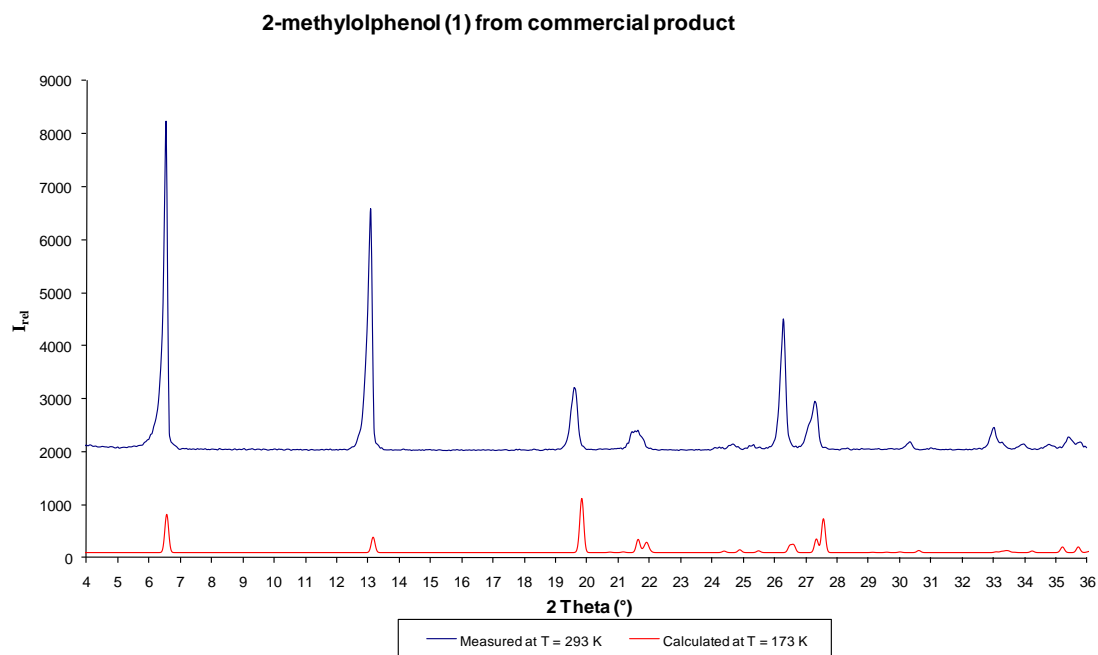

Figure S2: Comparison of powder pattern obtained from commercial product and that calculated from the single crystal structure.

### 2-methylolphenol (1) from methanol

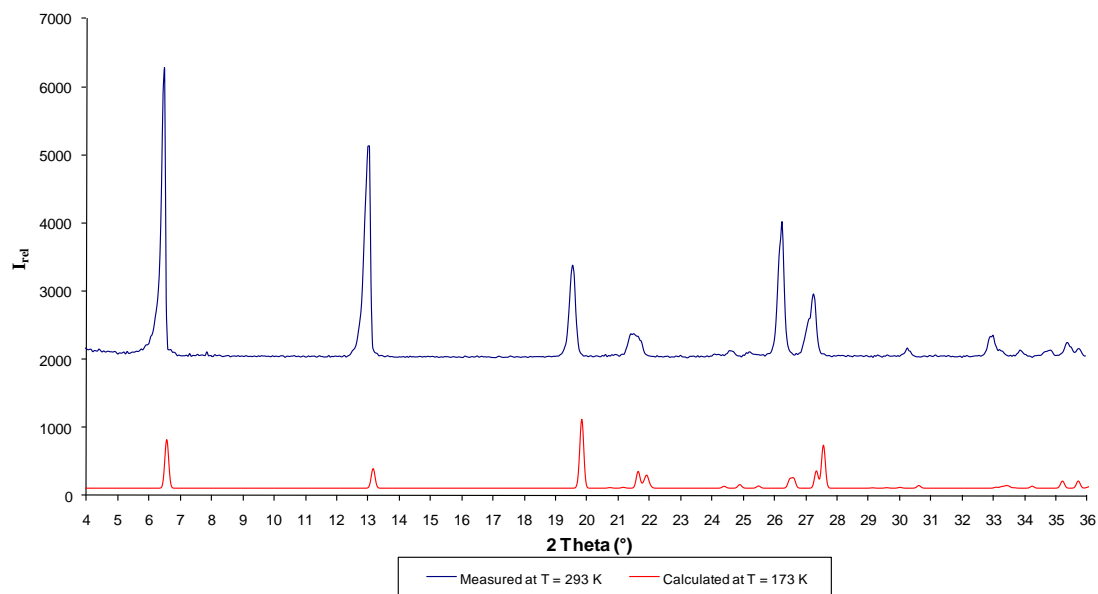

Figure S3: Comparison of powder pattern of crystals grown from methanol and that calculated from the single crystal structure for (1).

### 2-methylolphenol (1) from ethanol

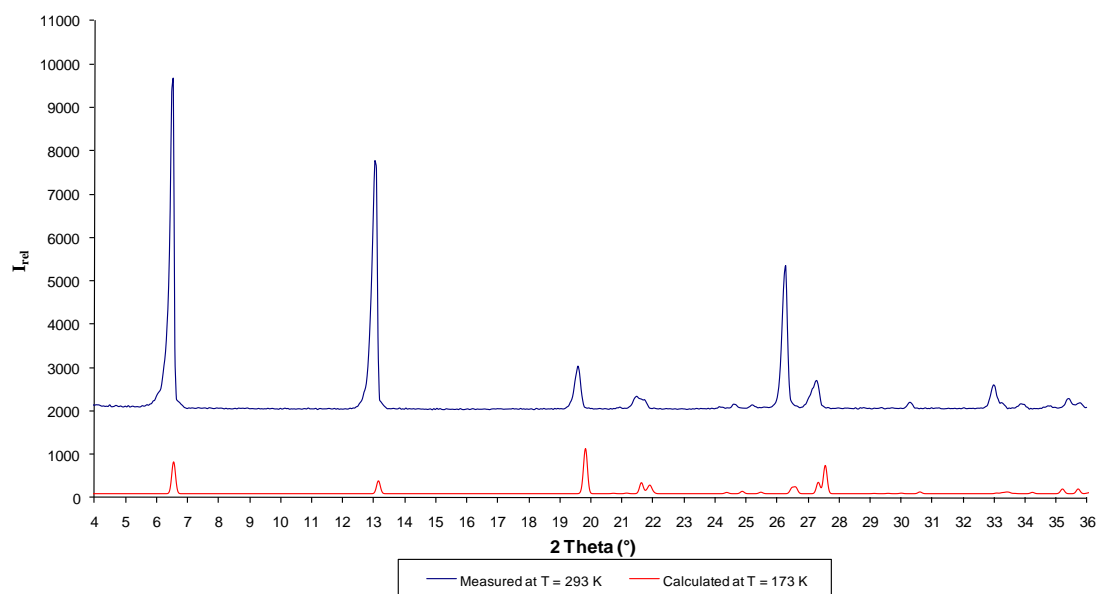

Figure S4: Comparison of powder pattern of crystals grown from ethanol and that calculated from the single crystal structure for (1).

2-methylolphenol (**1**) from tetrahydrofuran

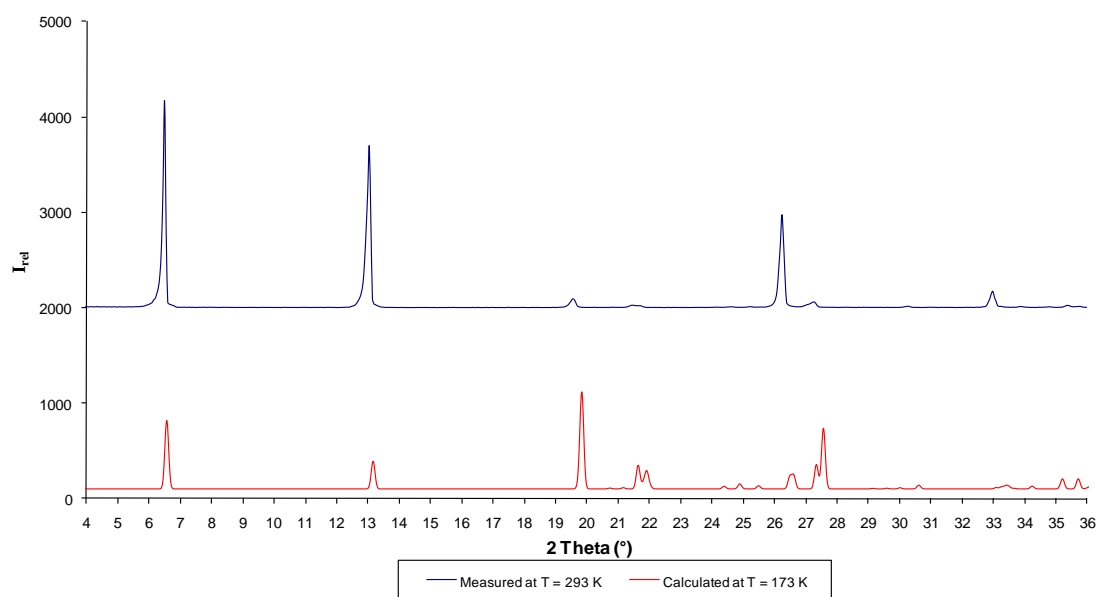

Figure S5: Comparison of powder pattern of crystals grown from tetrahydrofuran and that calculated from the single crystal structure for (**1**).

2-methylolphenol (**1**) from acetone

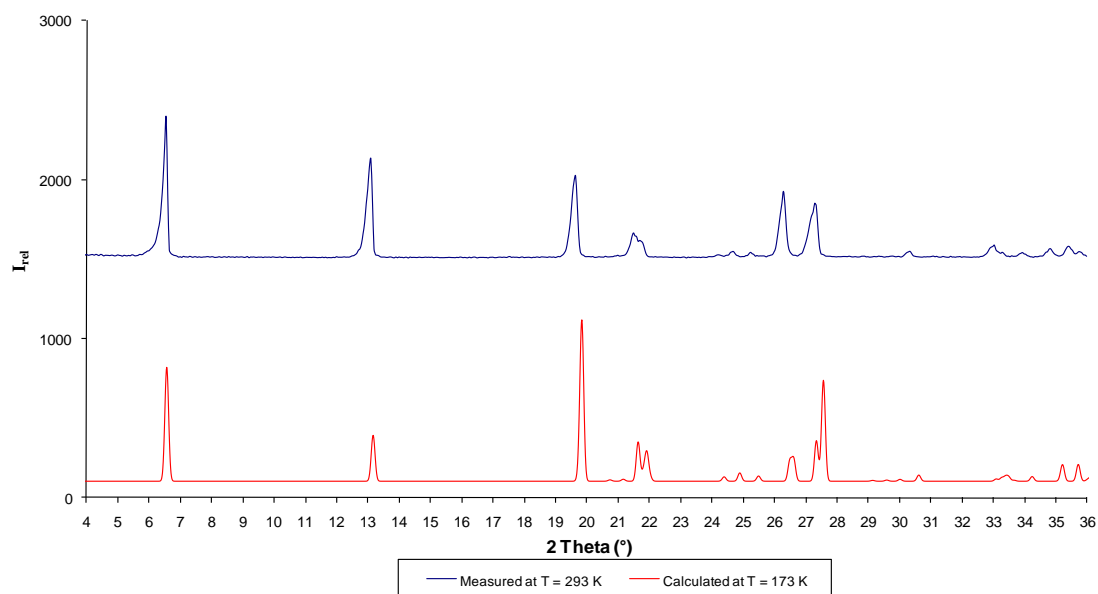

Figure S6: Comparison of powder pattern of crystals grown from acetone and that calculated from the single crystal structure for (**1**).

## 2) 3-methylolphenol (2)

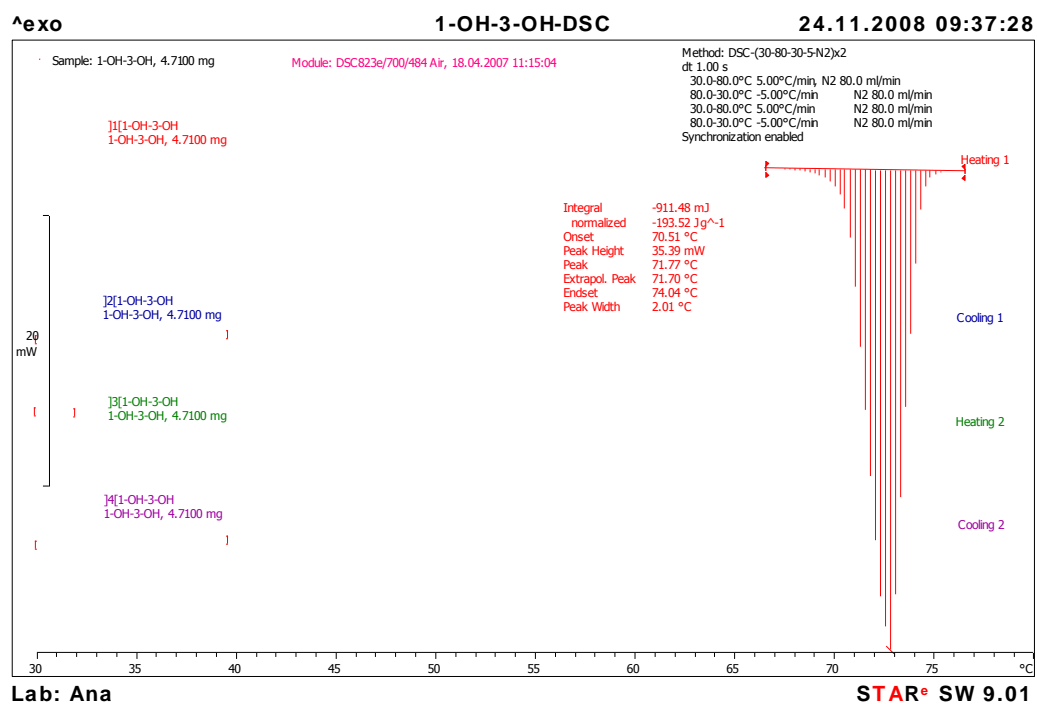

Figure S7: DSC trace of commercial product.

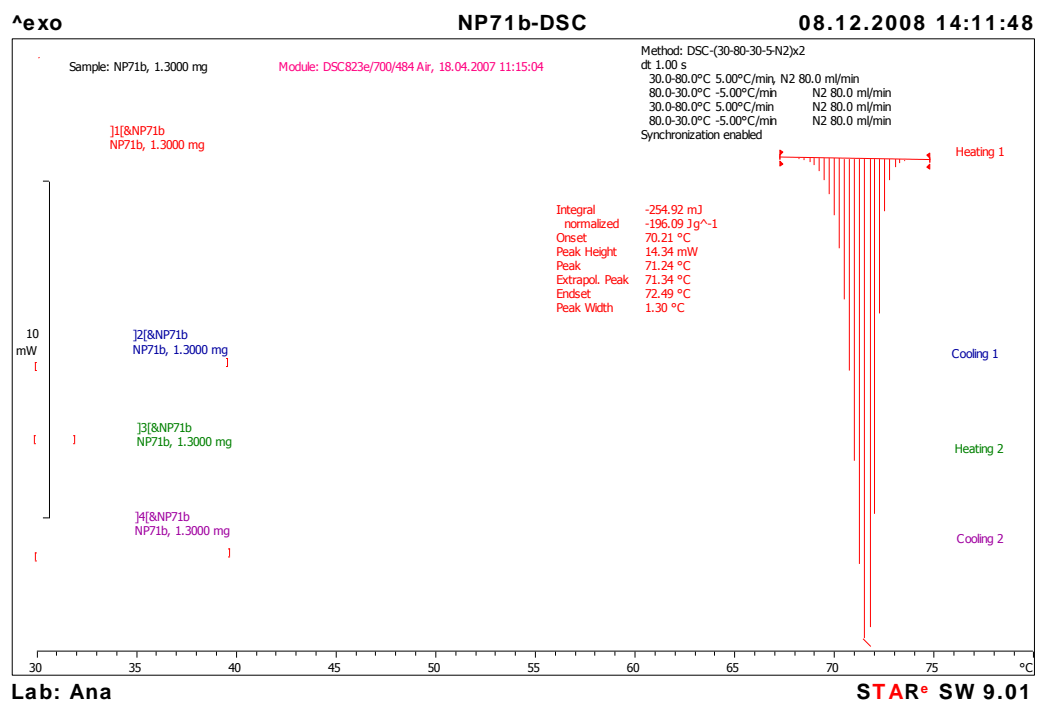

Figure S8: DSC trace for  $Z' = 2$  (2a).

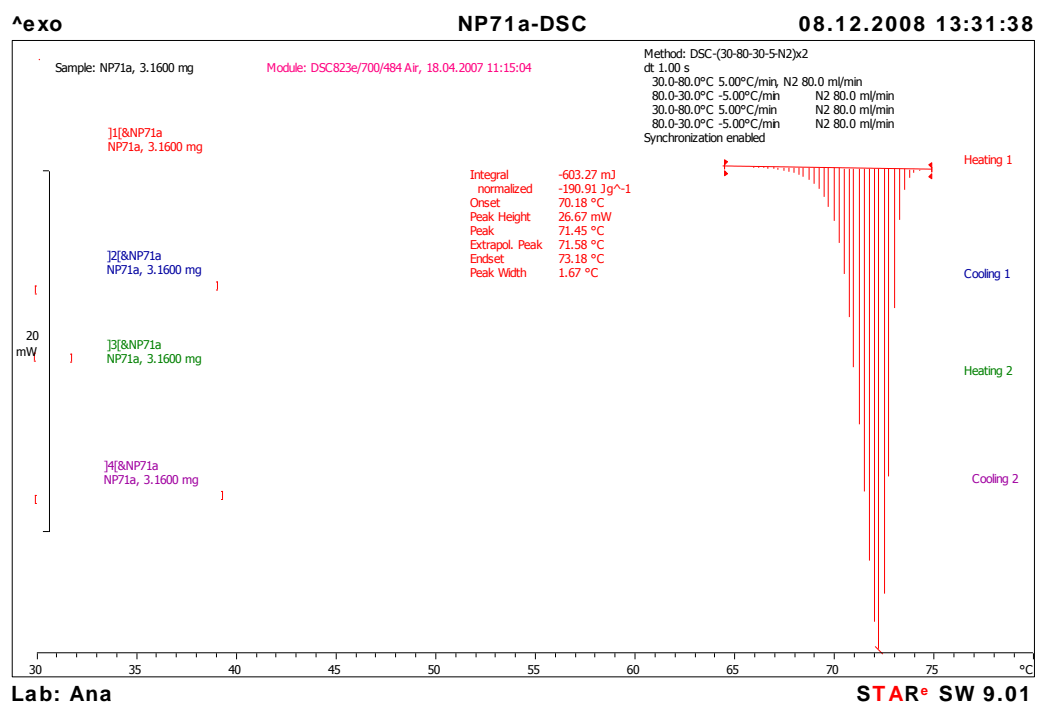

Figure S9: DSC trace for  $Z' = 3$  (**2b**).

The major differences between the two polymorphs is in the peaks at  $2\theta = 6.5^\circ$ ,  $18.5^\circ$ ,  $19.5^\circ$ , which are absent in the  $Z' = 2$  polymorph, as shown below:

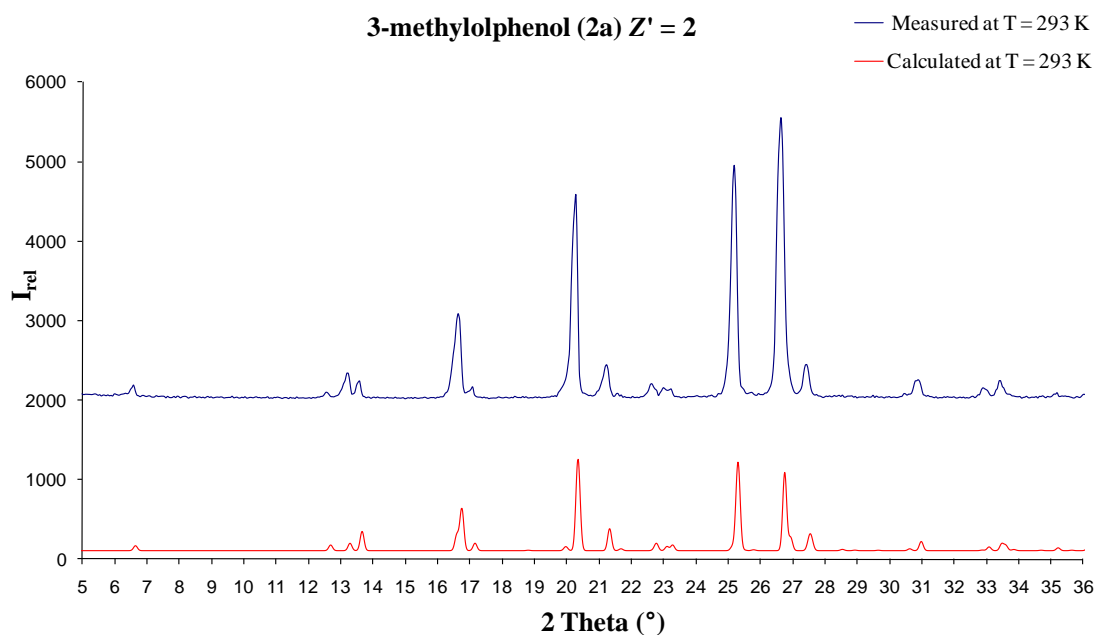

Figure S10: Comparison of powder pattern obtained from bulk material grown from methanol and that calculated from the single crystal structure for  $Z' = 2$  (**2a**).

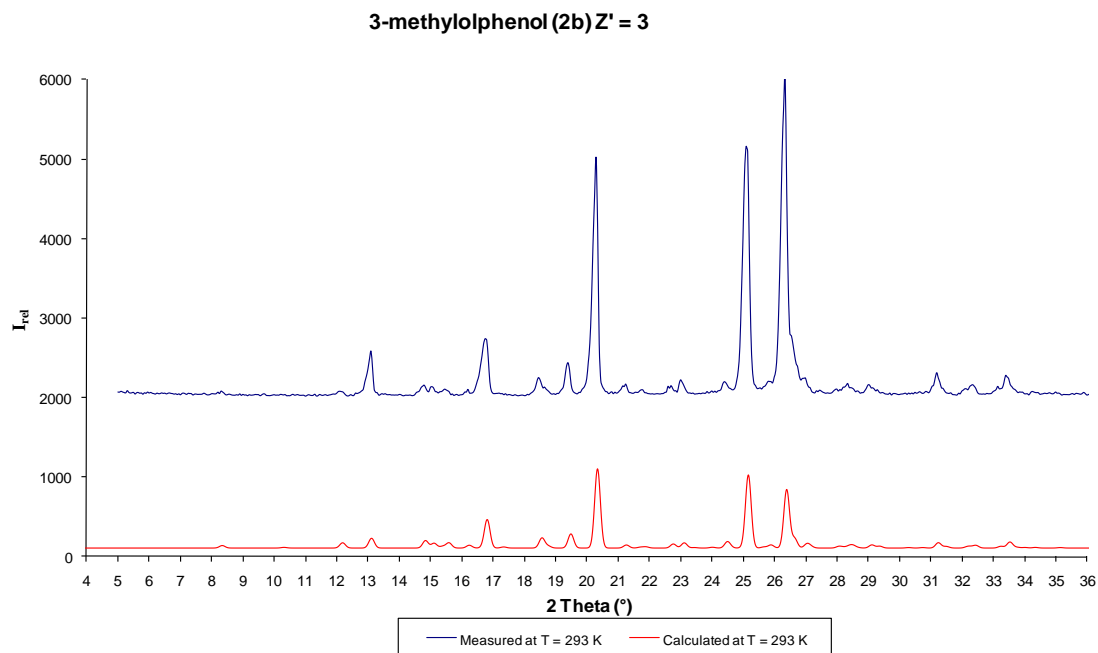

Figure S11: Comparison of powder pattern obtained from bulk material grown from methanol and that calculated from the single crystal structure for  $Z' = 3$  (**2b**).

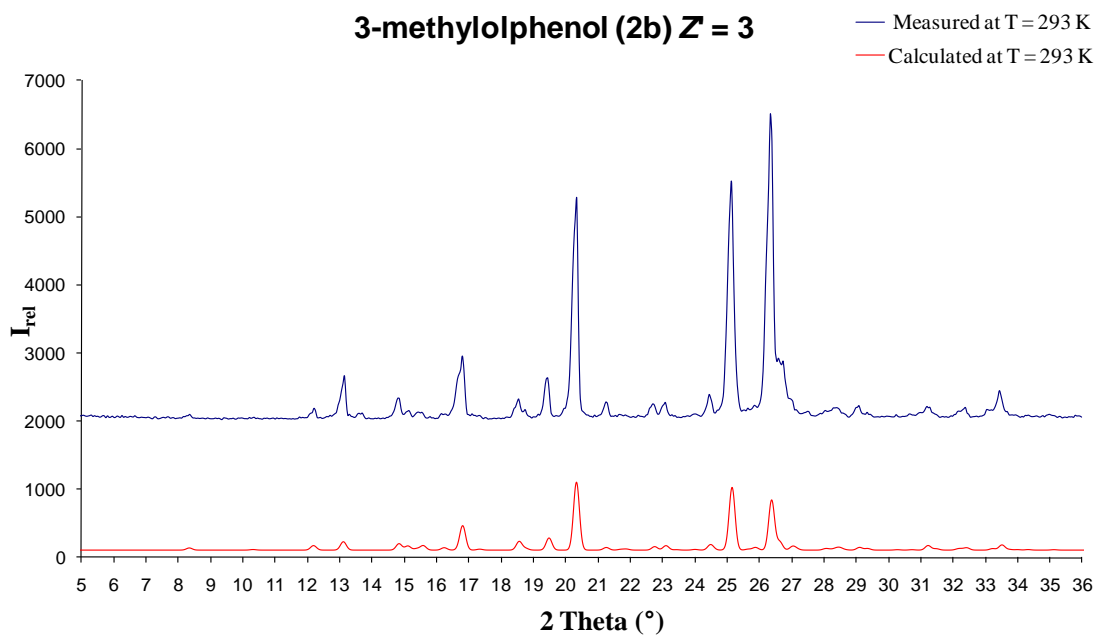

Figure S12: Comparison of powder pattern obtained from commercial product and that calculated from the single crystal structure of **2b**. Confirms that  $Z' = 3$  is the commercially available polymorph.

The  $Z' = 3$  polymorph was obtained from other slow evaporation crystallizations, using the solvents ethyl acetate, ethanol, acetone and tetrahydrofuran, shown below:

**3-methylphenol (2b)  $Z' = 3$  from ethyl acetate**

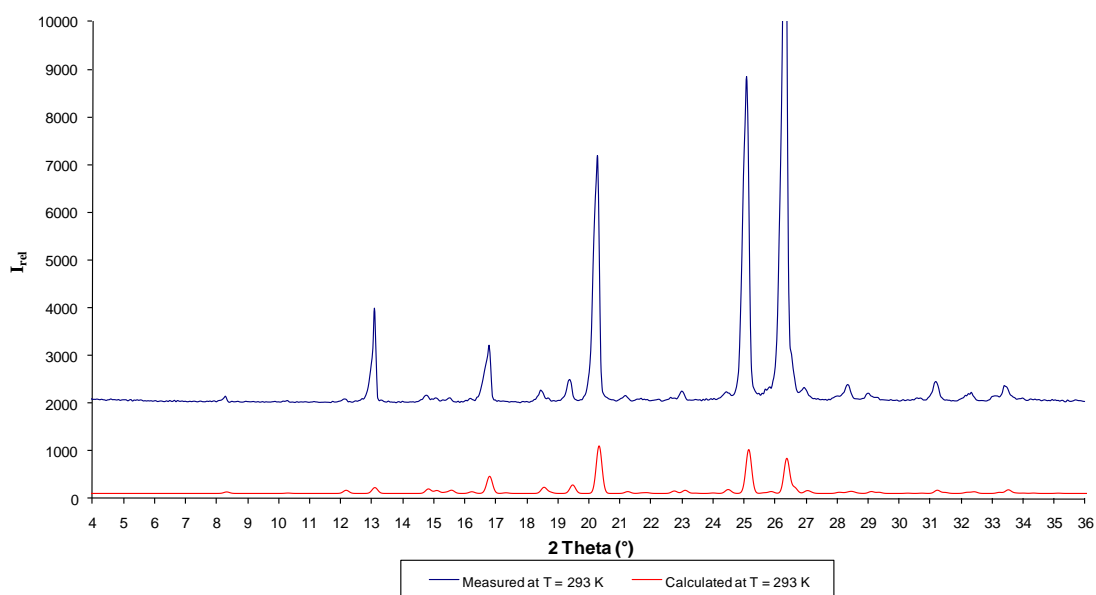

Figure S13: Comparison of powder pattern of crystals grown from ethyl acetate and that calculated from the single crystal structure for  $Z' = 3$  (**2b**).

**2-methylphenol  $Z' = 3$  from ethanol**

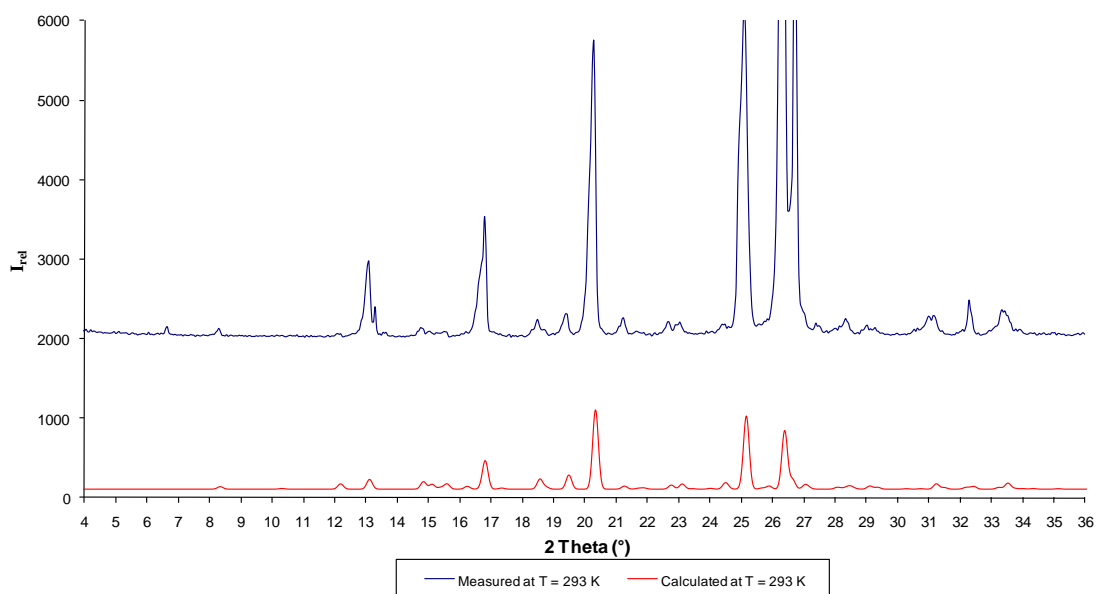

Figure S14: Comparison of powder pattern of crystals grown from ethanol and that calculated from the single crystal structure for  $Z' = 3$  (**2b**).



2-methylolphenol (2b)  $Z' = 3$  from acetone

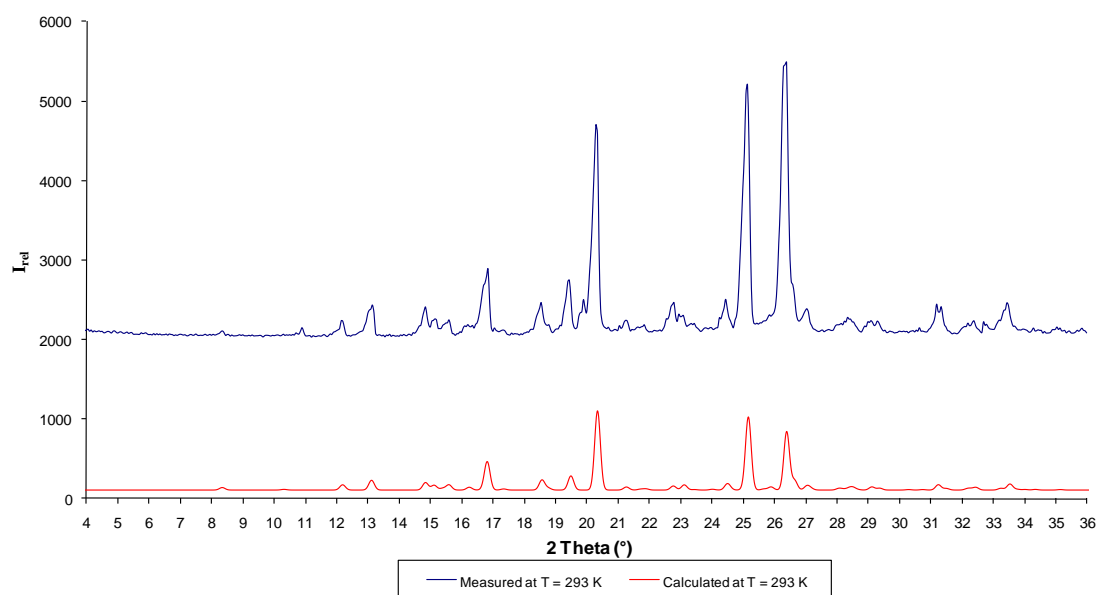

Figure S15: Comparison of powder pattern of crystals grown from acetone and that calculated from the single crystal structure for  $Z' = 3$  (**2b**).

3-methylolphenol (2b)  $Z' = 3$  from tetrahydrofuran

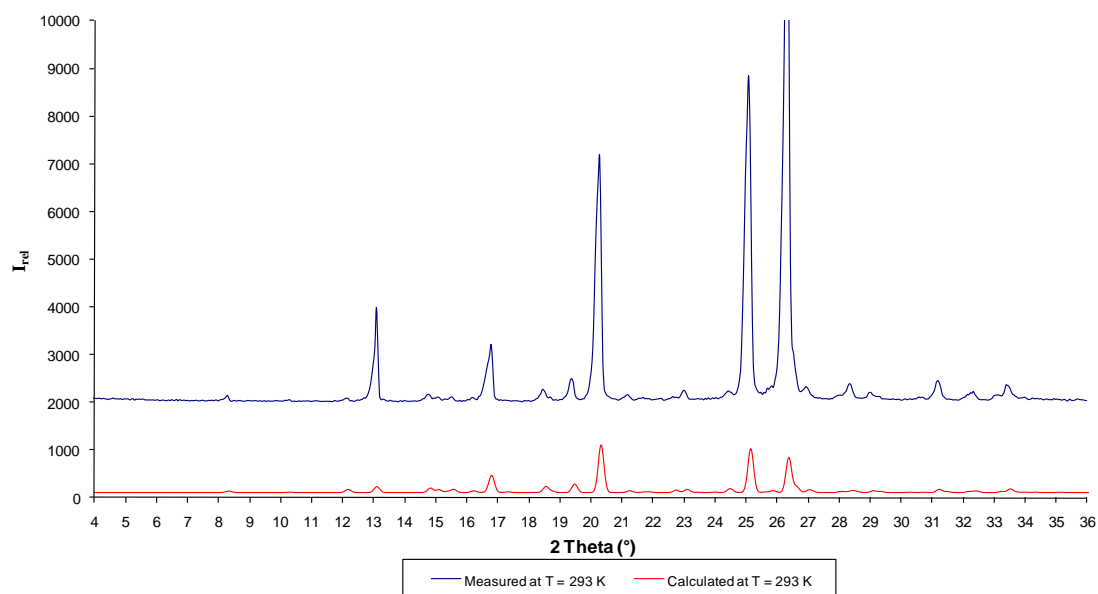

Figure S16: Comparison of powder pattern of crystals grown from tetrahydrofuran and that calculated from the single crystal structure for  $Z' = 3$  (**2b**).

### 3) 4-methylolphenol (3)

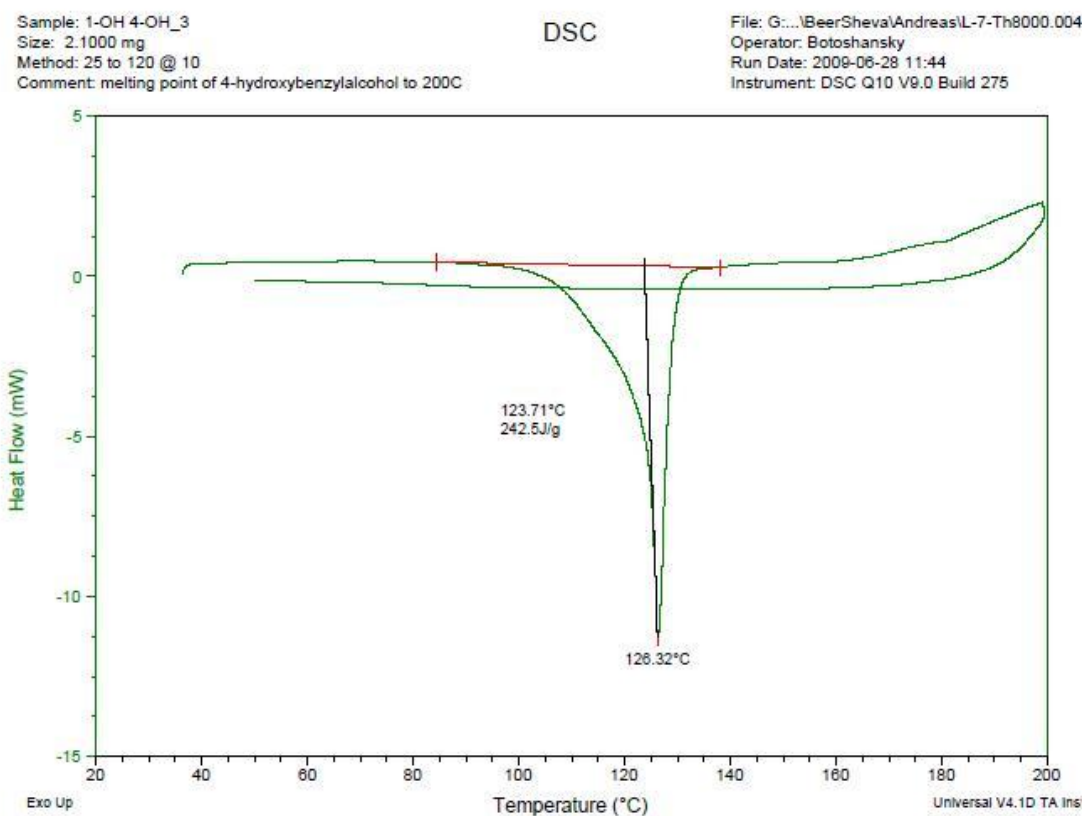

Figure S17: DSC trace 4-hydroxybenzyl alcohol.

#### 4-methylolphenol(3) from commercial product

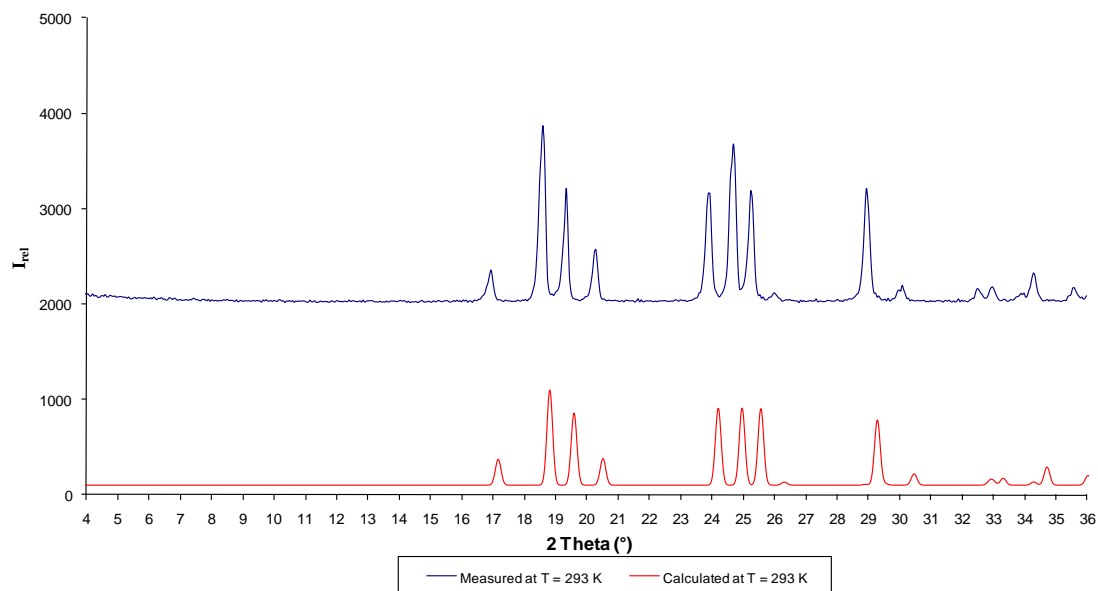

Figure S18: Comparison of powder pattern obtained from commercial product and that calculated from the single crystal structure.

#### 4-methylphenol (**3**) from methanol

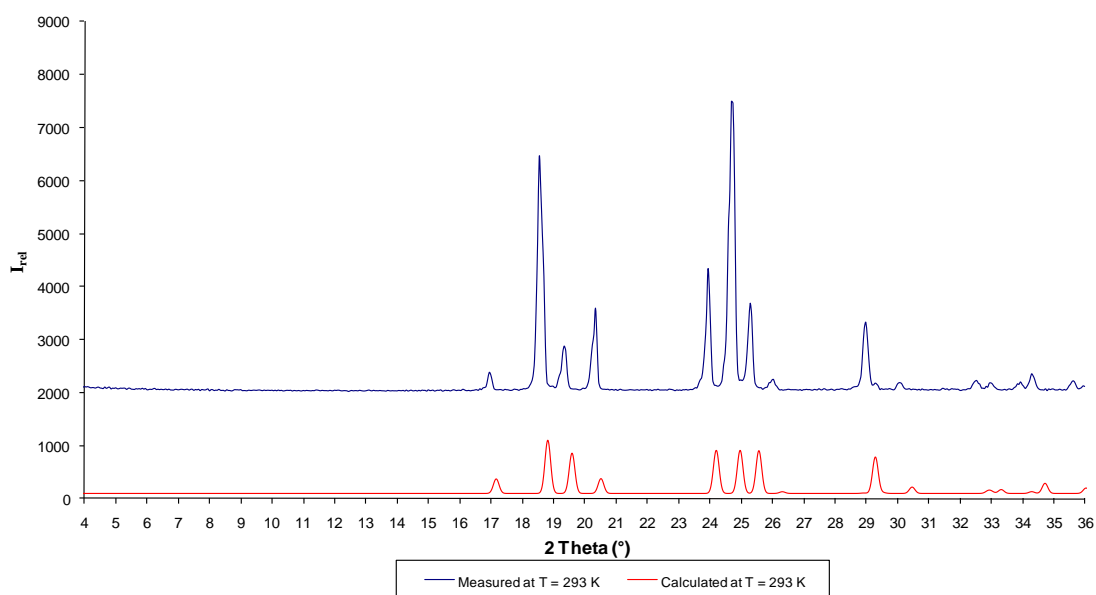

Figure S19: Comparison of powder pattern of crystals grown from methanol and that calculated from the single crystal structure for (**3**).

#### 4-methylphenol (**3**) from isopropanol

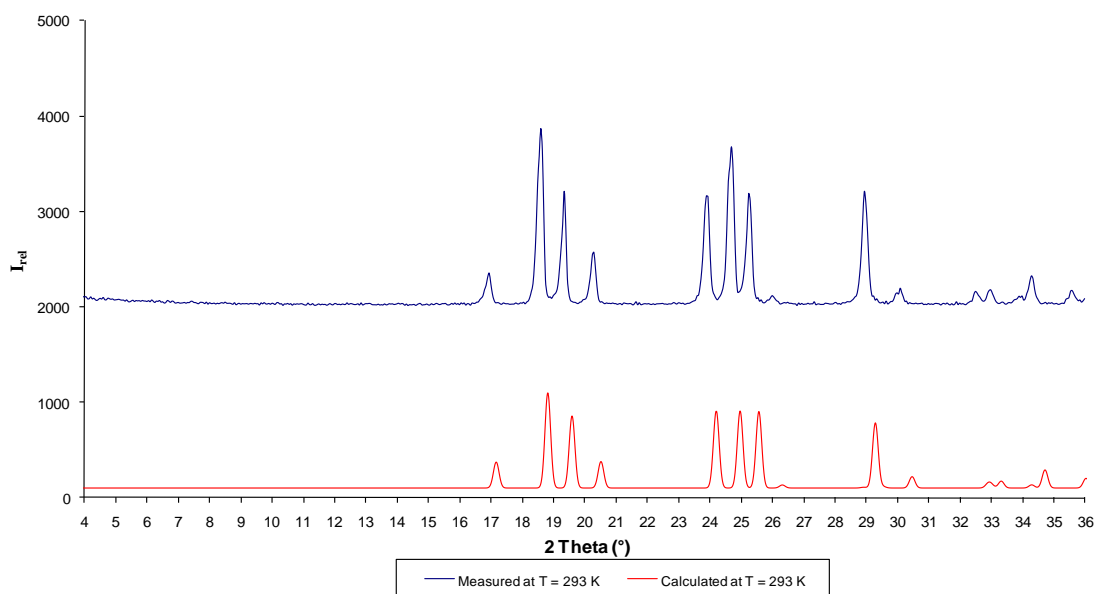

Figure S20: Comparison of powder pattern of crystals grown from isopropanol and that calculated from the single crystal structure for (**3**).

4-methylphenol (**3**) from acetonitrile

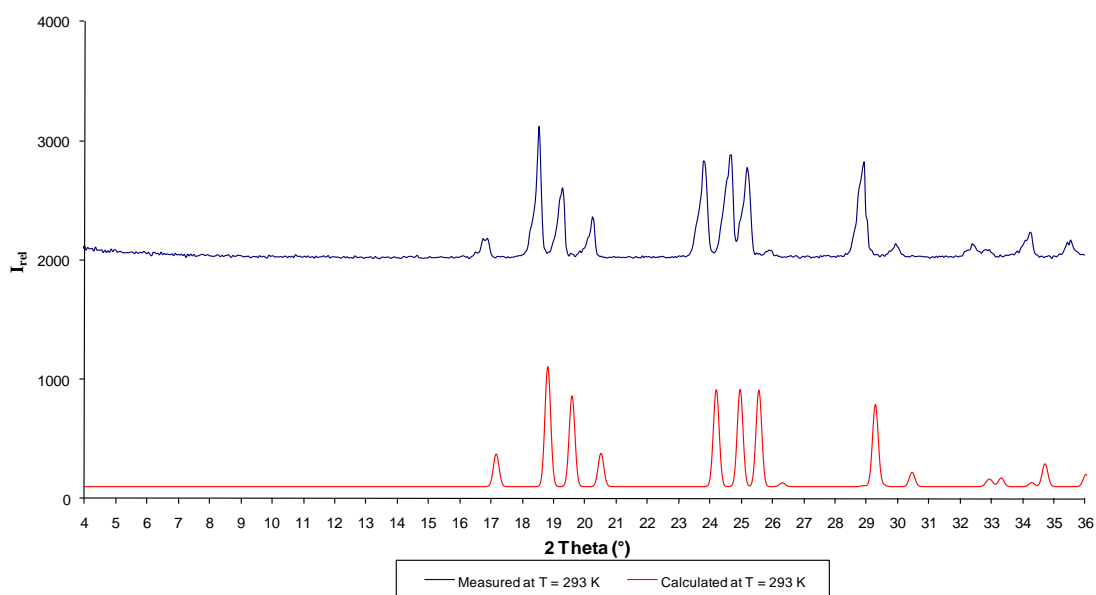

Figure S21: Comparison of powder pattern of crystals grown from acetonitrile and that calculated from the single crystal structure for (**3**).

4-methylphenol (**3**) from tetrahydrofuran

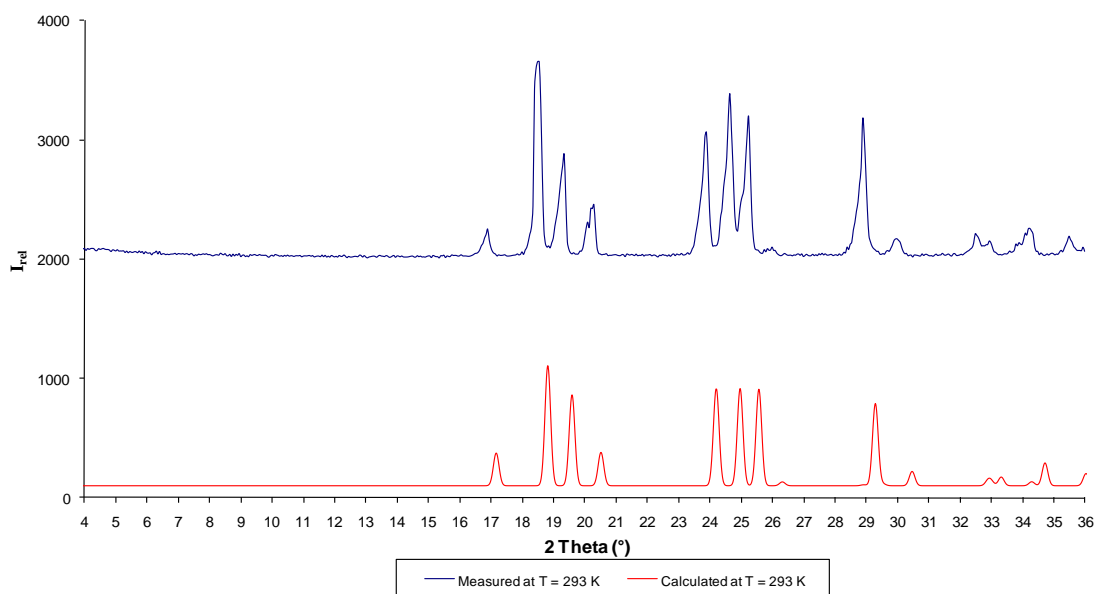

Figure S22: Comparison of powder pattern of crystals grown from tetrahydrofuran and that calculated from the single crystal structure for (**3**).

4-methylphenol (**3**) from ethyl acetate

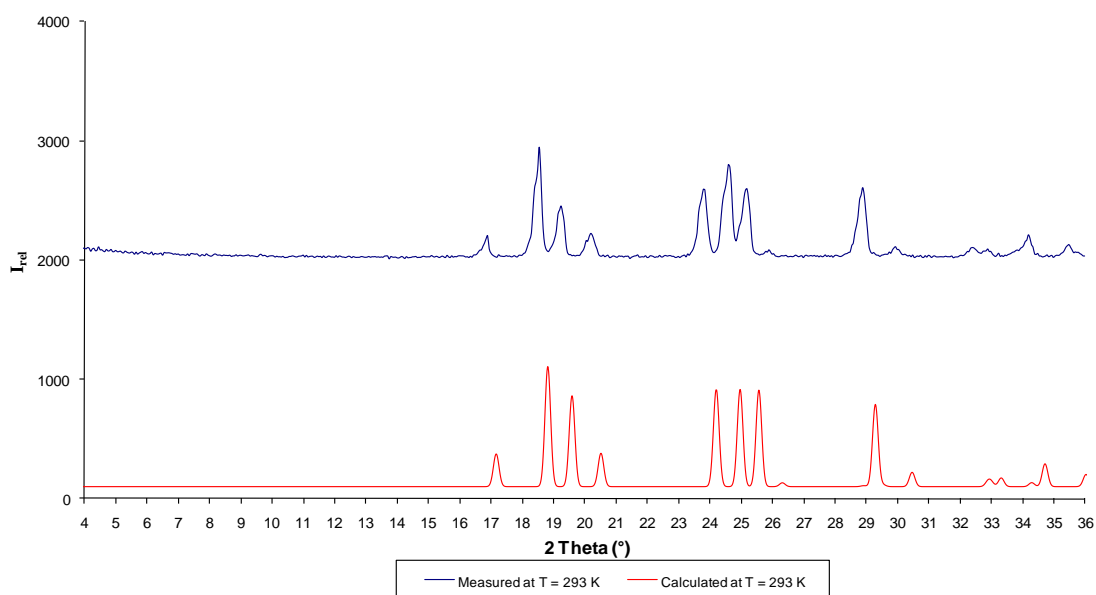

Figure S23: Comparison of powder pattern of crystals grown from ethyl acetate and that calculated from the single crystal structure for (**3**).

4-methylphenol (**3**) from acetone

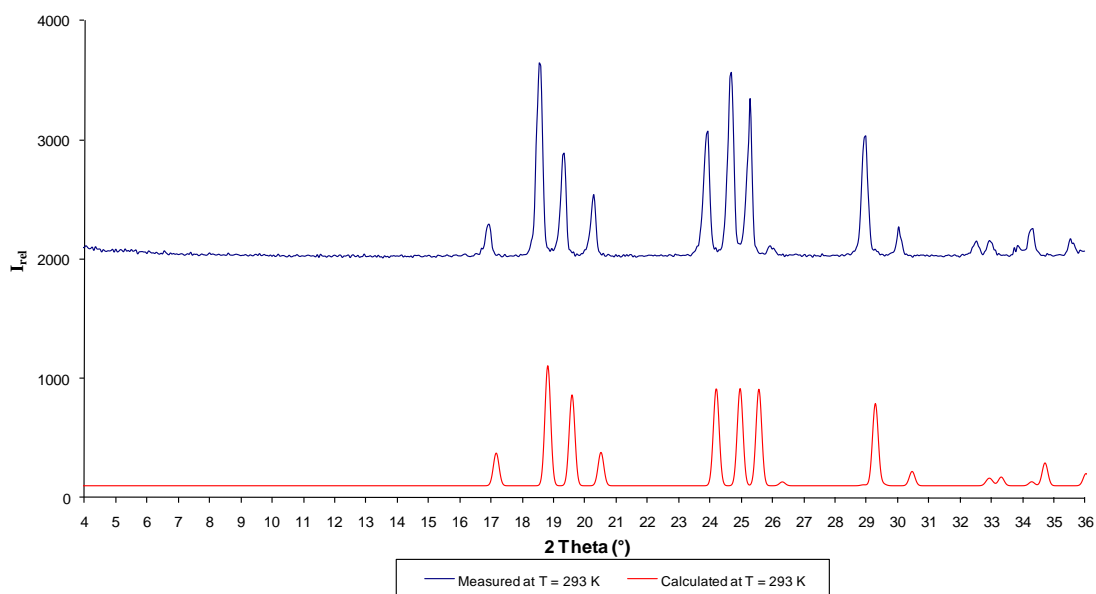

Figure S24: Comparison of powder pattern of crystals grown from acetone and that calculated from the single crystal structure for (**3**).

#### 4) Computational results

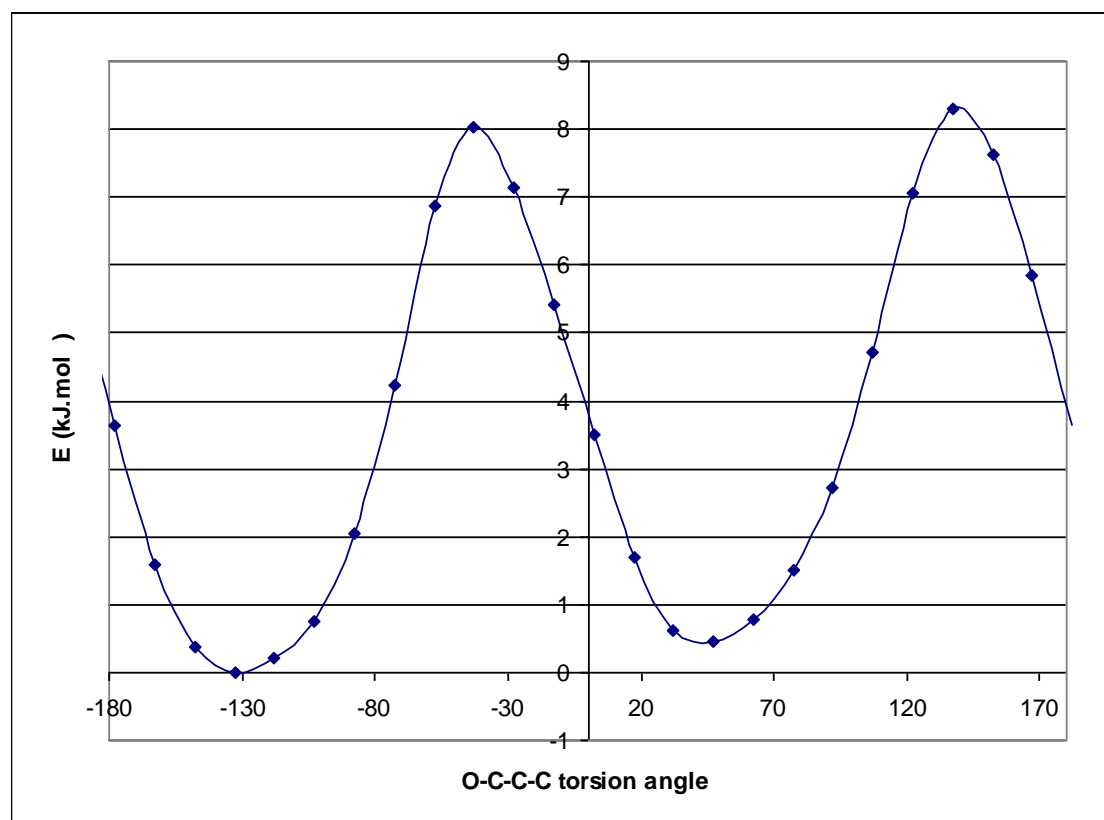

Figure S25: Potential energy scan for rotation around the O-C-C-C torsion angle in **2**, showing the low barrier to rotation ( $< 9 \text{ kJ.mol}^{-1}$ )

**Table S1** Intermolecular interactions involved in **1** – **3** in  $\text{kJ.mol}^{-1}$  calculated at the M06-2X/6-31+G(d) level of theory, with H-atom positions optimized at the B3LYP/6-31+G(d) level. Molecules involved in each interaction are placed in the same relative positions as found in the crystal structure. Molecules are numbered according to Figure S26. The total stabilization experienced (in  $\text{kJ mol}^{-1}$ ) by each crystallographically independent molecule is calculated from the individual interactions.

|          | Interaction* | E ( $\text{kJ.mol}^{-1}$ ) | Total stabilization |
|----------|--------------|----------------------------|---------------------|
| <b>1</b> | 1            | -34.7                      | -159.1**            |
|          | 2            | -45.4                      |                     |
|          | 3            | -4.5                       |                     |
|          | 4            | -4.5                       |                     |
|          | 5            | -13.7                      |                     |
|          | 6            | -12.1                      |                     |
|          | 7            | -3.5                       |                     |
|          | 8            | -3.5                       |                     |
|          | 9            | -0.3                       |                     |
|          | 10           | -4.2                       |                     |
|          | 11           | -12.1                      |                     |
|          | 12           | -13.7                      |                     |

|    |  |                 |       |          |
|----|--|-----------------|-------|----------|
|    |  | 13              | -1.5  |          |
|    |  | 14              | -2.7  |          |
|    |  | 15              | -2.7  |          |
|    |  | 16              | -34.7 |          |
|    |  | Molecule A with |       | -195.4** |
|    |  | B (B)           | -19.6 |          |
|    |  | 2 (B)           | -30.0 |          |
|    |  | 4 (A)           | -28.1 |          |
|    |  | 5 A             | -28.1 |          |
|    |  | 6 (B)           | -20.4 |          |
|    |  | 7 (A)           | -5.1  |          |
|    |  | 8 (A)           | -20.4 |          |
|    |  | 9 (A)           | -3.4  |          |
|    |  | 11 (B)          | -3.3  |          |
|    |  | 12 (A)          | -5.1  |          |
|    |  | 13 (B)          | -19.6 |          |
|    |  | 14 (A)          | -5.1  |          |
|    |  | 15 (A)          | -2.4  |          |
|    |  | 16 (B)          | -4.3  |          |
| 2a |  | 18 (B)          | -0.5  |          |
|    |  | Molecule B with |       | -175.3** |
|    |  | A (A)           | -19.6 |          |
|    |  | 1 (A)           | -30.0 |          |
|    |  | 2 (B)           | -2.0  |          |
|    |  | 3 (B)           | -27.7 |          |
|    |  | 4 (A)           | -20.4 |          |
|    |  | 6 (B)           | -27.7 |          |
|    |  | 9 (A)           | -3.3  |          |
|    |  | 16 (B)          | -4.0  |          |
|    |  | 18 (B)          | -4.6  |          |
|    |  | 20 (B)          | -4.6  |          |
|    |  | 21 (A)          | -4.3  |          |
|    |  | 22 (B)          | -21.1 |          |
|    |  | 23 (B)          | -4.0  |          |
|    |  | 24 (B)          | -2.0  |          |
|    |  | Molecule A with |       | -146.2** |
|    |  | B (B)           | -19.8 |          |
|    |  | 3 (C)           | -31.3 |          |
|    |  | 4 (A)           | -25.4 |          |
|    |  | 5 (B)           | -20.0 |          |
|    |  | 6 (C)           | -2.4  |          |
|    |  | 7 (A)           | -25.4 |          |
| 2b |  | 14 (C)          | -3.9  |          |
|    |  | 15 (B)          | -3.5  |          |
|    |  | 16 (B)          | -3.2  |          |
|    |  | 17 (C)          | -20.2 |          |
|    |  | 18 (C)          | -2.1  |          |
|    |  | 19 (B)          | -2.9  |          |
|    |  | 20 (B)          | -6.5  |          |
|    |  | 23 (A)          | -0.7  |          |

|   |                 |     |       |          |
|---|-----------------|-----|-------|----------|
|   | 25              | (C) | -4.3  |          |
|   | Molecule B with |     |       | -199.1** |
|   | A               | (A) | -19.8 |          |
|   | C               | (C) | -19.1 |          |
|   | 3               | (C) | -1.7  |          |
|   | 5               | (B) | -27.8 |          |
|   | 6               | (C) | -19.9 |          |
|   | 7               | (A) | -20.0 |          |
|   | 10              | (B) | -27.8 |          |
|   | 13              | (A) | -2.9  |          |
|   | 23              | (A) | -6.5  |          |
|   | 31              | (A) | -3.2  |          |
|   | 25              | (C) | -4.0  |          |
|   | 27              | (B) | -5.5  |          |
|   | 29              | (A) | -20.5 |          |
|   | 30              | (B) | -20.4 |          |
|   | Molecule C with |     |       | -175.1** |
|   | B               | (B) | -19.1 |          |
|   | 6               | (C) | -29.2 |          |
|   | 8               | (C) | -29.2 |          |
|   | 7               | (A) | -2.4  |          |
|   | 10              | (B) | -19.9 |          |
|   | 13              | (C) | -31.3 |          |
|   | 31              | (A) | -3.9  |          |
|   | 33              | (C) | -1.7  |          |
|   | 34              | (A) | -20.2 |          |
|   | 35              | (C) | -2.4  |          |
|   | 36              | (B) | -4.0  |          |
|   | 37              | (A) | -4.3  |          |
|   | 38              | (C) | -5.4  |          |
|   | 39              | (C) | -2.1  |          |
|   | 1               |     | -15.3 | -187.2** |
|   | 2               |     | -29.4 |          |
|   | 3               |     | -6.8  |          |
|   | 4               |     | -17.4 |          |
|   | 5               |     | -0.3  |          |
|   | 6               |     | -6.9  |          |
|   | 7               |     | -11.7 |          |
| 3 | 8               |     | -29.4 |          |
|   | 9               |     | -6.8  |          |
|   | 10              |     | -0.3  |          |
|   | 11              |     | -5.8  |          |
|   | 12              |     | -5.8  |          |
|   | 13              |     | -17.4 |          |
|   | 14              |     | -11.7 |          |
|   | 15              |     | -6.9  |          |
|   | 16              |     | -15.3 |          |

\* Letter in parenthesis indicates conformation of second molecule involved in the interaction.

\*\* Sum of all interactions with surrounding molecules.



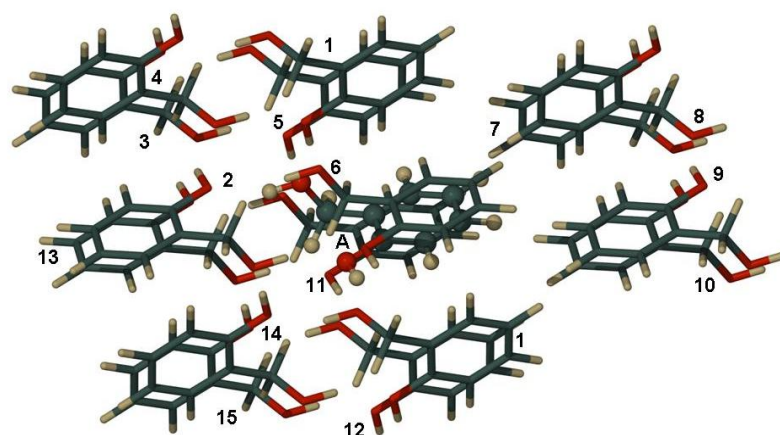

(1)

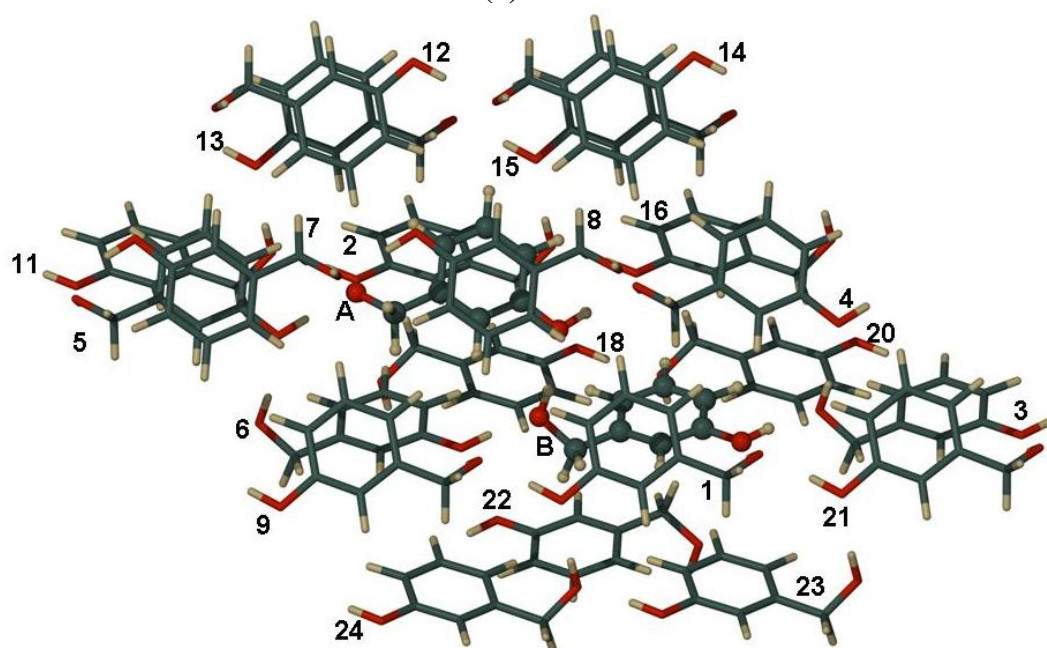

(2a)

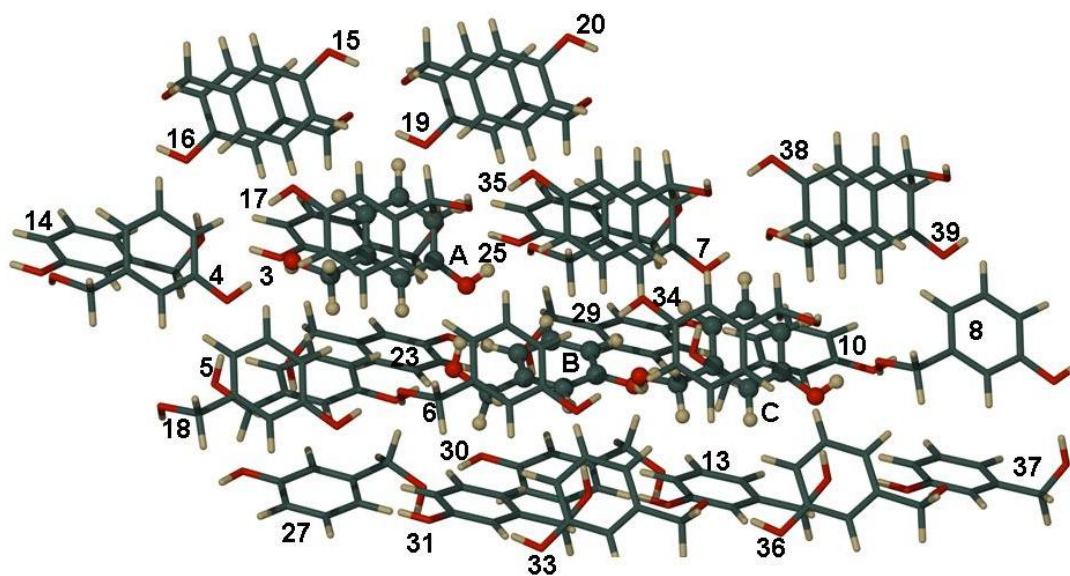

(2b)

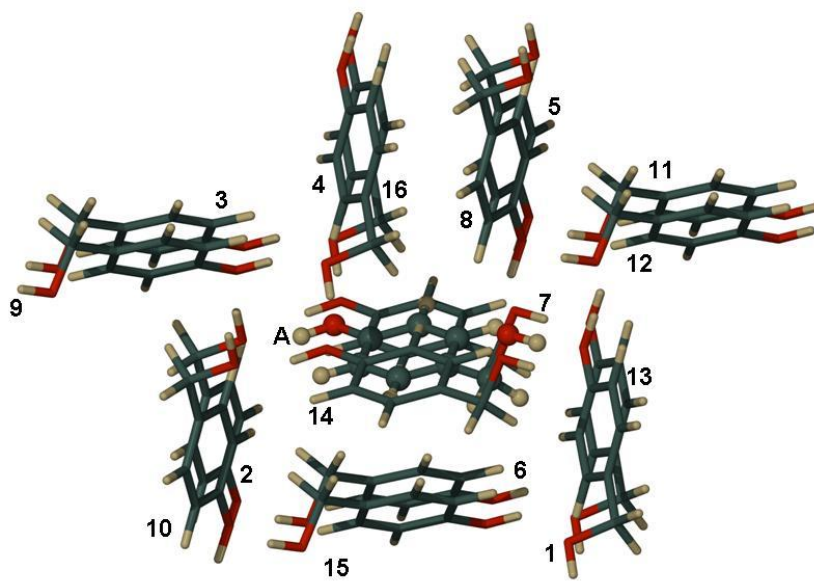

(3)

Figure S26: Spheres of inclusion around crystallographically independent molecules (A-C, indicated by ball and stick models) for **1** – **3** used to determine all intermolecular interactions referred to in Table S1.
